# Supplementary material for: Induction of antiinflammatory purinergic signaling in activated human iNKT cells
Source: JCI journal article supplement (doi:10.1172/jci.insight.91954), 2018-09-05
Supplement: sd1 [file 1]

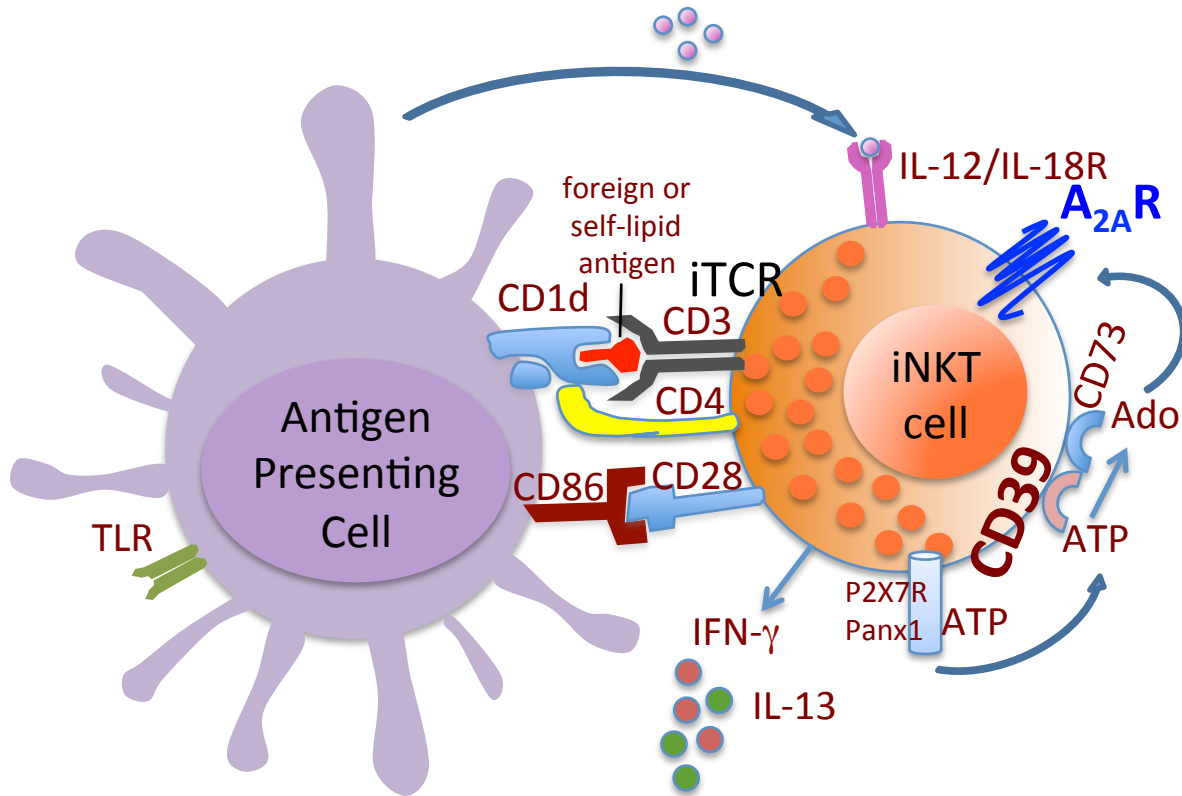

**Supplemental figure 1. Diagram showing pathways of iNKT activation and induction of purinergic signaling molecules.** Purified human iNKT cells in culture can be stimulated by lipid antigen presentation to the invariant TCR or by plate-bound  $\alpha$ CD3 antibodies and co-stimulation with soluble  $\alpha$ CD28 antibodies, or by cytokines IL-12/IL-18. Stimulated cells produce Th1 cytokines such as IFN- $\gamma$  and Th-2 cytokines such as IL-13. Upon stimulation of iNKT cells there is an induction of P2X7 receptors that can interact with pannexin 1 to form pores large enough to conduct ATP. iNKT cell activation also induces CD39 and CD73 that together convert ATP in the extracellular space to adenosine. The A<sub>2A</sub>R, which binds adenosine to produce anti-inflammatory signaling is also induced by iNKT cell activation.

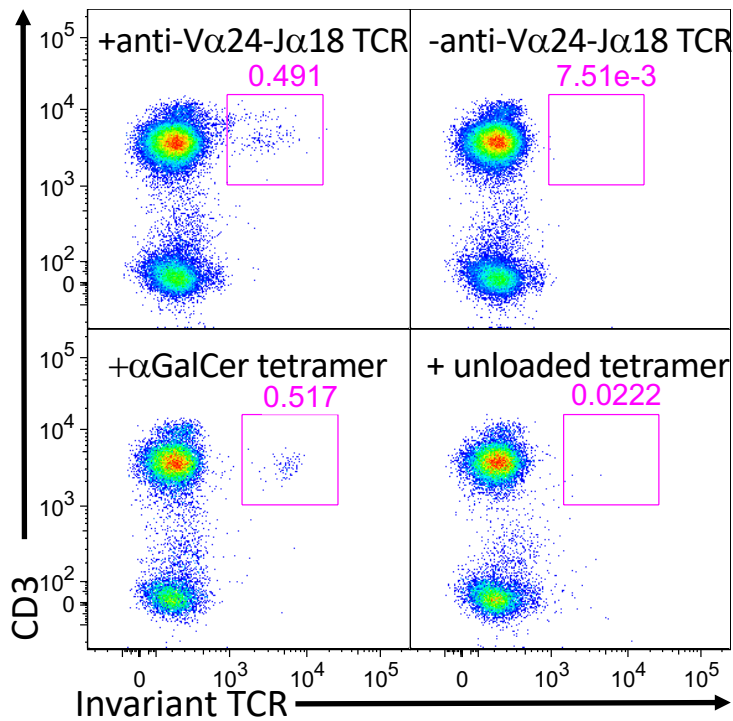

**Supplemental figure 2. Validation of antibody 6B11 for detecting human iNKT cells.** PBMCs ( $5 \times 10^5$ ) isolated from a healthy adult donor were immunostained to identify iNKT cells positive for expression of CD3 and the invariant TCR identified with either FITC conjugated anti-human Valpha24-Jalpha18 TCR antibody (6B11) or with FITC conjugated  $\alpha$ GalCer loaded tetramers. Negative controls consisted of FMO (absence of 6B11 antibody) or FITC conjugated unloaded tetramers. The results of typical of triplicate experiments.

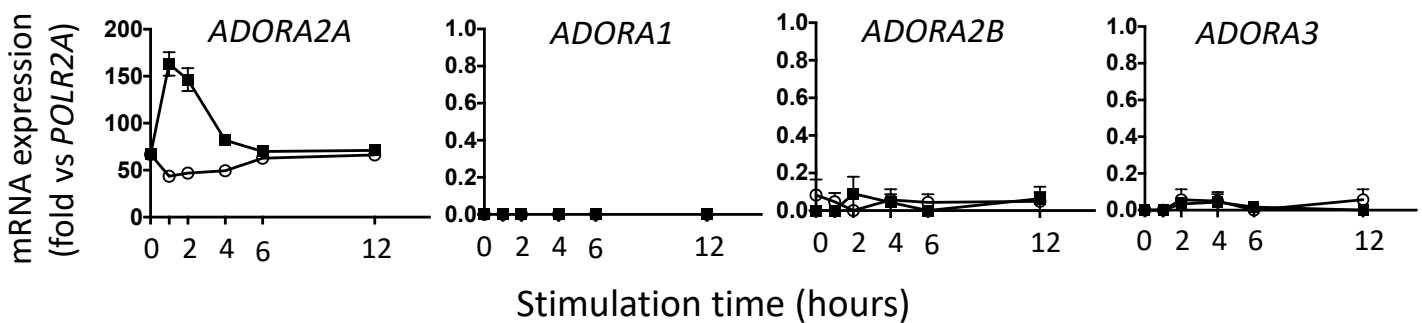

**Supplemental figure 3. Expression of adenosine receptor transcripts in unstimulated (○) and stimulated (●) human iNKT cells.** Cells were stimulated with 5 ug/ml plate bound anti-CD3 for the indicated times. Messenger RNA expression is normalized to the housekeeping gene, *POLR2A*.

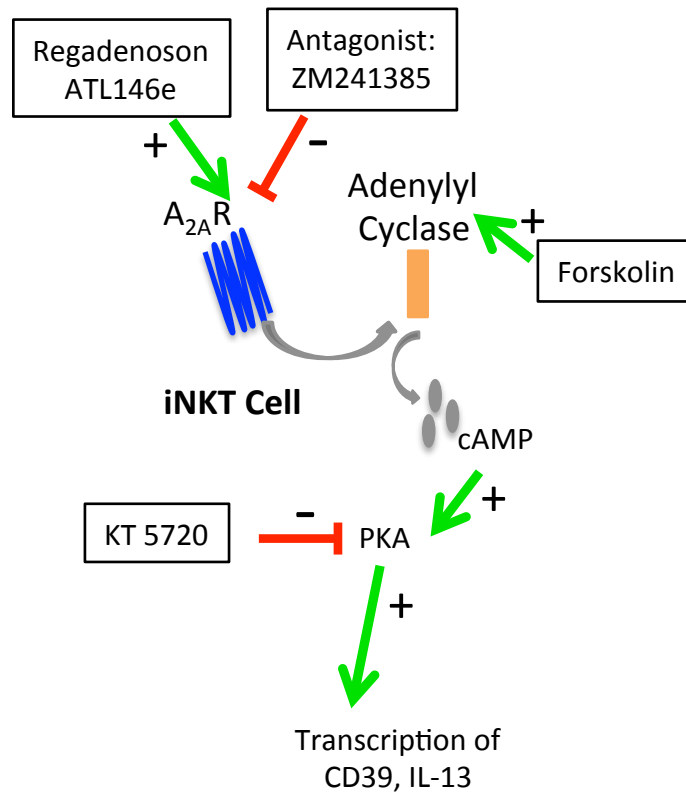

**Supplemental figure 4. Diagram showing the effects of drugs that control transcription of CD39 and IL-13 in iNKT cells.** Regadenoson and ATL146e are agonists and ZM241385 is an antagonist of adenosine A<sub>2A</sub> receptor. A<sub>2A</sub>R activation or forskolin stimulate adenylyl cyclase to elevate cAMP and activate protein kinase A and enhance the production of CD39 and IL-13. The cell-permeable inhibitor, KT 5720, blocks PKA activation and counteracts the effects of A<sub>2A</sub>R agonists and forskolin.
